# Supplementary material for: Brønsted-NH4+ mechanism versusnitrite mechanism: new insight into the selective catalyticreduction of NO by NH3
Source: Royal Society of Chemistry journal article supplement (doi:10.1039/c0cp00256a), 2010-10-29
Supplement: c0cp00256a.pdf [file c0cp00256a.pdf]

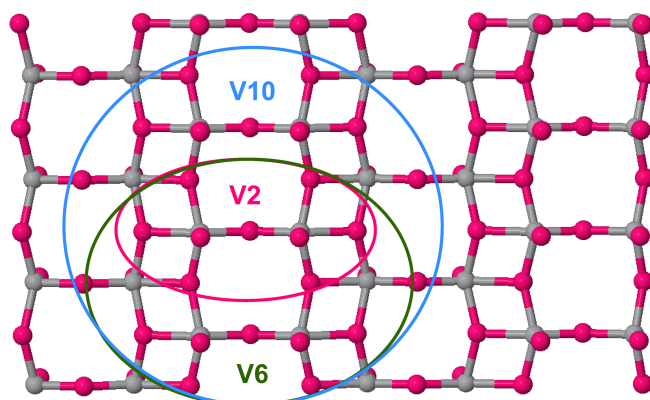

(a) (010) basal face of  $V_2O_5$

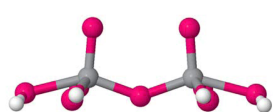

(b)  $V_2O_9H_8$  (**V2**)

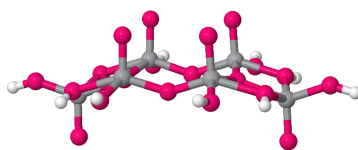

(c)  $V_6O_{20}H_{10}$  (**V6**)

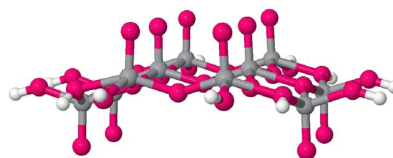

(d)  $V_{10}O_{31}H_{12}$  (**V10**)

**Fig. 1S** Structures of cluster models used to represent the (010) surface of  $V_2O_5$ .

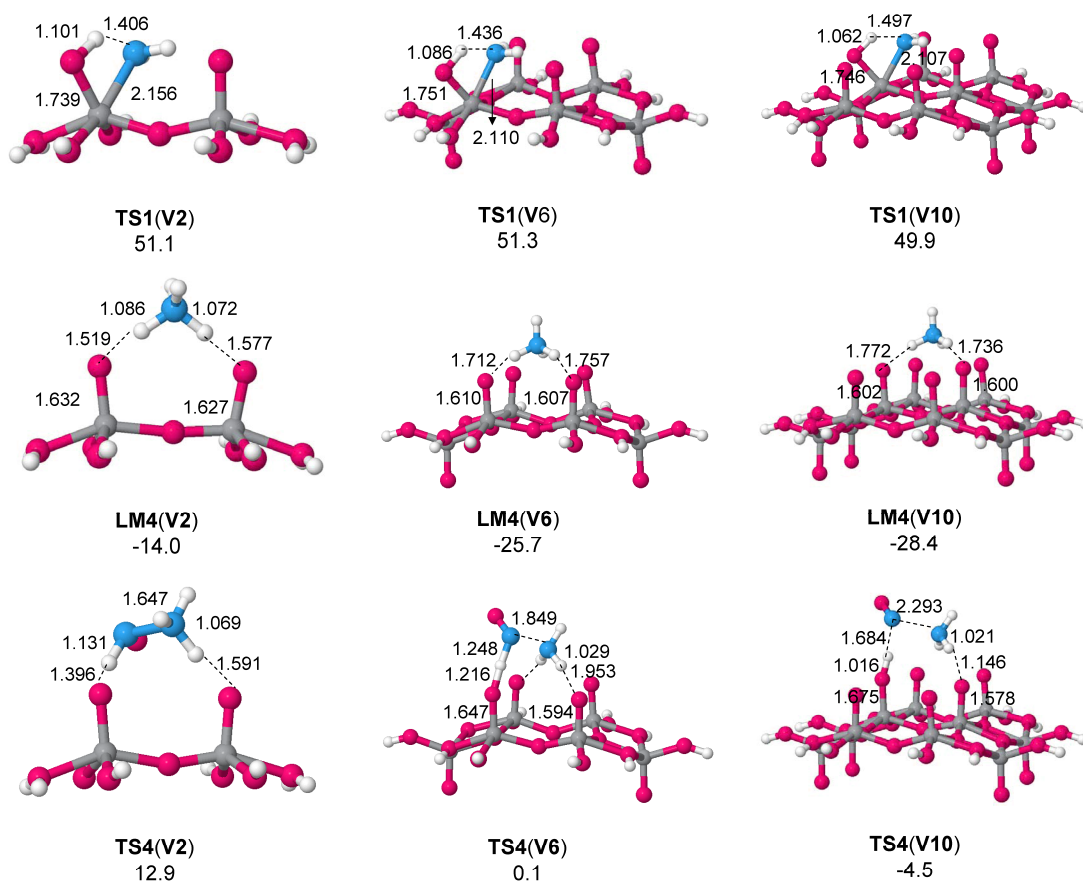

**Fig. 2S** Optimized geometries and energetics of selected LMs and TS' (bond length in Å; relative energy in kcal mol<sup>-1</sup>).

**Table 1S.** Theoretical benchmark for test reactions.

| Reactions                                               | $\Delta H_{298}(\text{kcal mol}^{-1})$ |                     |
|---------------------------------------------------------|----------------------------------------|---------------------|
|                                                         | Calc.                                  | Expt.               |
| $\text{NO} \rightarrow 0.5\text{N}_2 + 0.5\text{O}_2$   | 21.7                                   | 21.8 <sup>a</sup>   |
| $\text{NH}_3 \rightarrow 0.5\text{N}_2 + 1.5\text{H}_2$ | -13.0                                  | -11.0 <sup>a</sup>  |
| $\text{NH}_3 \rightarrow \text{NH}_2 + \text{H}$        | 105.0                                  | 107.6 <sup>b</sup>  |
| $\text{NH}_3 + \text{H}^+ \rightarrow \text{NH}_4^+$    | -201.7                                 | -204.0 <sup>b</sup> |
| $\text{NH}_3 \rightarrow \text{NH}_3^+ + \text{e}$      | 235.0                                  | 232.2 <sup>c</sup>  |
| $\text{NH}_4^+ \rightarrow \text{NH}_3^+ + \text{H}$    | 123.0                                  | 122.5 <sup>d</sup>  |

- a. *CRC Handbook of Chemistry and Physics, 82<sup>nd</sup> ed.*; CRC Press: Boca Raton, FL, 2002.
- b. Y. Luo, *Comprehensive handbook of chemical bond energies*. CRC Press: Boca Raton, FL, 2007.
- c. Data from <http://webbook.nist.gov/chemistry/>
- d. Data deduced from ref. b and ref. c
